# Supplementary material for: The Yeast Histone Chaperone Chromatin Assembly Factor 1 Protects Against Double-Strand DNA-Damaging Agents
Source: Oxford University Press journal article supplement (doi:10.1534/genetics.105.043000), 2005-09-03
Supplement: supplemental_text.doc [file supplemental_text.doc]

**Supplemental Figure 1:** CAF-1 mutants can activate and subsequently release from the DNA damage checkpoint as measured by flow cytometry. MMS was added to logarithmically growing cultures of WT (JKT0010), *cac2∆* (NWY008) and *rad52∆* (JKT0004) to a final concentration of 0.005%, for 2.5 hours. Cells were pelleted and washed twice with YEPD and allowed to recover for up to 8 hours. Samples were taken for cell cycle analysis at the indicated times.

**Supplemental Materials and Methods:**

**Cell Cycle Analysis:** MMS was added to logarithmically growing cultures to a final concentration of 0.005%, for 2.5 hours. Cells were pelleted and washed twice with YEPD and allowed to recover for the indicated time. For cell cycle analysis, ~5 x 106 cells for each sample were stained with propidium iodide as described previously (Stone and Pillus 1996). 10,000 cells from each sample were scanned with a Beckman Coulter XL-MCL machine.

Stone, E. M., and L. Pillus, 1996 Activation of an MAP kinase cascade leads to Sir3p hyperphosphorylation and strengthens transcriptional silencing. J Cell Bio**l 13**5: 571-583.
